# Supplementary material for: Real-Time Culture-Independent Microbial Profiling Onboard the International Space Station Using Nanopore Sequencing
Source: PubMed Central journal article supplement (PMC7830261; doi:10.3390/genes12010106), 2021-01-16
Supplement: genes-12-00106-s001.pdf [file genes-12-00106-s001.pdf]

## Supplementary Materials

**Table S1.** Description of sampling locations and DNA concentrations for swabs collected from NASA Johnson Space Center's Human Health and Performance Laboratory in Houston, Texas.

| <b>Name</b> | <b>Descriptions of sample</b>           | <b>Location</b>                    | <b>DNA (ng/ul)</b> |
|-------------|-----------------------------------------|------------------------------------|--------------------|
| Bench       | Back of leg press exercise bench        | High Bay Exercise Room, North Wing | <0.01              |
| Bike-1      | Bike handle bars, swab 1                | Rm 1229, North Wing                | 0.137              |
| Bike-2      | Bike handle bars, swab 2                | Rm 1229, North Wing                | 0.276              |
| Bin         | Plastic storage bin                     | Rm 1229, North Wing                | 0.132              |
| Bracket-1   | Harness bracket                         | Rm 1229, North Wing                | 0.816              |
| Bracket-2   | Harness bracket                         | Rm 1229, North Wing                | 0.154              |
| Countertop  | Breakroom countertop                    | Rm 1100, South Wing                | 0.14               |
| Desk        | Desk countertop                         | Rm 1108D, South Wing               | 0.212              |
| Dispenser   | Paper towel dispenser sensor area       | Rm 11RW, South Wing                | 0.114              |
| Door-1      | Women restroom door handle, swab 1      | Rm 11RW, South Wing                | <0.01              |
| Door-2      | Women restroom door handle, swab 2      | Rm 11RW, South Wing                | <0.01              |
| Flywheel    | Handle on Flywheel exercise device      | Rm 1229, North Wing                | 0.086              |
| Fridge      | Refrigerator door handle                | Rm 1100, South Wing                | 0.17               |
| Handle      | Handle on leg press exercise device     | High Bay Exercise Room, North Wing | 0.272              |
| Keyboard    | Computer keyboard                       | Rm 1112D, South Wing               | 0.164              |
| Microwave-1 | Microwave door handle, swab 1           | Rm 1100, South Wing                | 0.102              |
| Microwave-2 | Microwave door handle, swab 2           | Rm 1100, South Wing                | 0.206              |
| Rack        | Weight Rack                             | High Bay Exercise Room, North Wing | 0.124              |
| Rower-1     | Handle on Rower exercise device, swab 1 | Rm 1229, North Wing                | 0.098              |
| Rower-2     | Handle on Rower exercise device, swab 2 | Rm 1229, North Wing                | 0.318              |
| Table       | Breakroom countertop                    | Rm 1100, South Wing                | <0.01              |
| Toilet-1    | Toilet seat, swab 1                     | Rm 11RW, South Wing                | 0.197              |
| Toilet-2    | Toilet seat, swab 2                     | Rm 11RW, South Wing                | 0.164              |

Note: the number following the sample name is the replicate of the sample.

**Table S2.** Ground swab DNA extraction yield comparisons between Claremont Bio OmniLyse® Cell Lysis Device and Lucigen QuickExtract™. Extracted DNA was measured using Qubit dsDNA high sensitivity kit (Thermo Fisher Scientific). Swabs were collected from parallel sample locations and identical concentrations of ZymoBIOMICS Microbial Community Standard (ZYMO Research) was used prior to DNA extraction.

| <b>Swab Location</b>                        | <b>QuickExtract™<br/>and Heat<br/>(ng/μl)</b> | <b>OmniLyse® Cell Lysis Device<br/>(ng/μl)</b> |
|---------------------------------------------|-----------------------------------------------|------------------------------------------------|
| Toilet Seat                                 | 0.0456                                        | <0.0005                                        |
| Bathroom Door                               | <0.0005                                       | <0.0005                                        |
| Conference Room Table                       | 0.0640                                        | <0.0005                                        |
| Keyboard                                    | 0.1630                                        | <0.0005                                        |
| Coffee Machine                              | 0.0908                                        | <0.0005                                        |
| Microwave Door                              | 0.4480                                        | <0.0005                                        |
| Negative Swab                               | <0.0005                                       | <0.0005                                        |
| ZymoBiomics Microbial Community<br>Standard | 12.8                                          | 4.2                                            |

**Table S3.** Sequencing run metrics for total reads mapped to 16S and *A. mellifera* positive control from sequencing runs onboard the International Space Station and ground controls.

| Location                                    | Sample Type         | Mapped Reads | Mean Read Length (bp) | Median Alignment Identity (%) |
|---------------------------------------------|---------------------|--------------|-----------------------|-------------------------------|
| Node 1S4 Dining Table Wall                  | 16S                 | 234,523      | 1572                  | 91.4                          |
|                                             | <i>A.mellifera</i>  | 46,772       | 725                   | 92.2                          |
| Permanent Multipurpose Module (PMM) Curtain | 16S                 | 872          | 1578                  | 91.2                          |
|                                             | <i>A.mellifera</i>  | 5,179        | 732                   | 91.8                          |
| Japanese Experiment Module (JEM) air grid   | 16S                 | 10,852       | 1583                  | 91.6                          |
|                                             | <i>A. mellifera</i> | 3,886        | 730                   | 92.1                          |
| Flight Negative Swab                        | 16S                 | 0            | NA                    | NA                            |
|                                             | <i>A.mellifera</i>  | 15,045       | 722                   | 91                            |
| Ground Negative Swab                        | 16S                 | 0            | NA                    | NA                            |
|                                             | <i>A.mellifera</i>  | 1,276        | 716                   | 92.2                          |
| Ground Positive Control                     | 16S                 | 59,475       | 1568                  | 91.5                          |
|                                             | <i>A.mellifera</i>  | 226          | 727                   | 92.3                          |

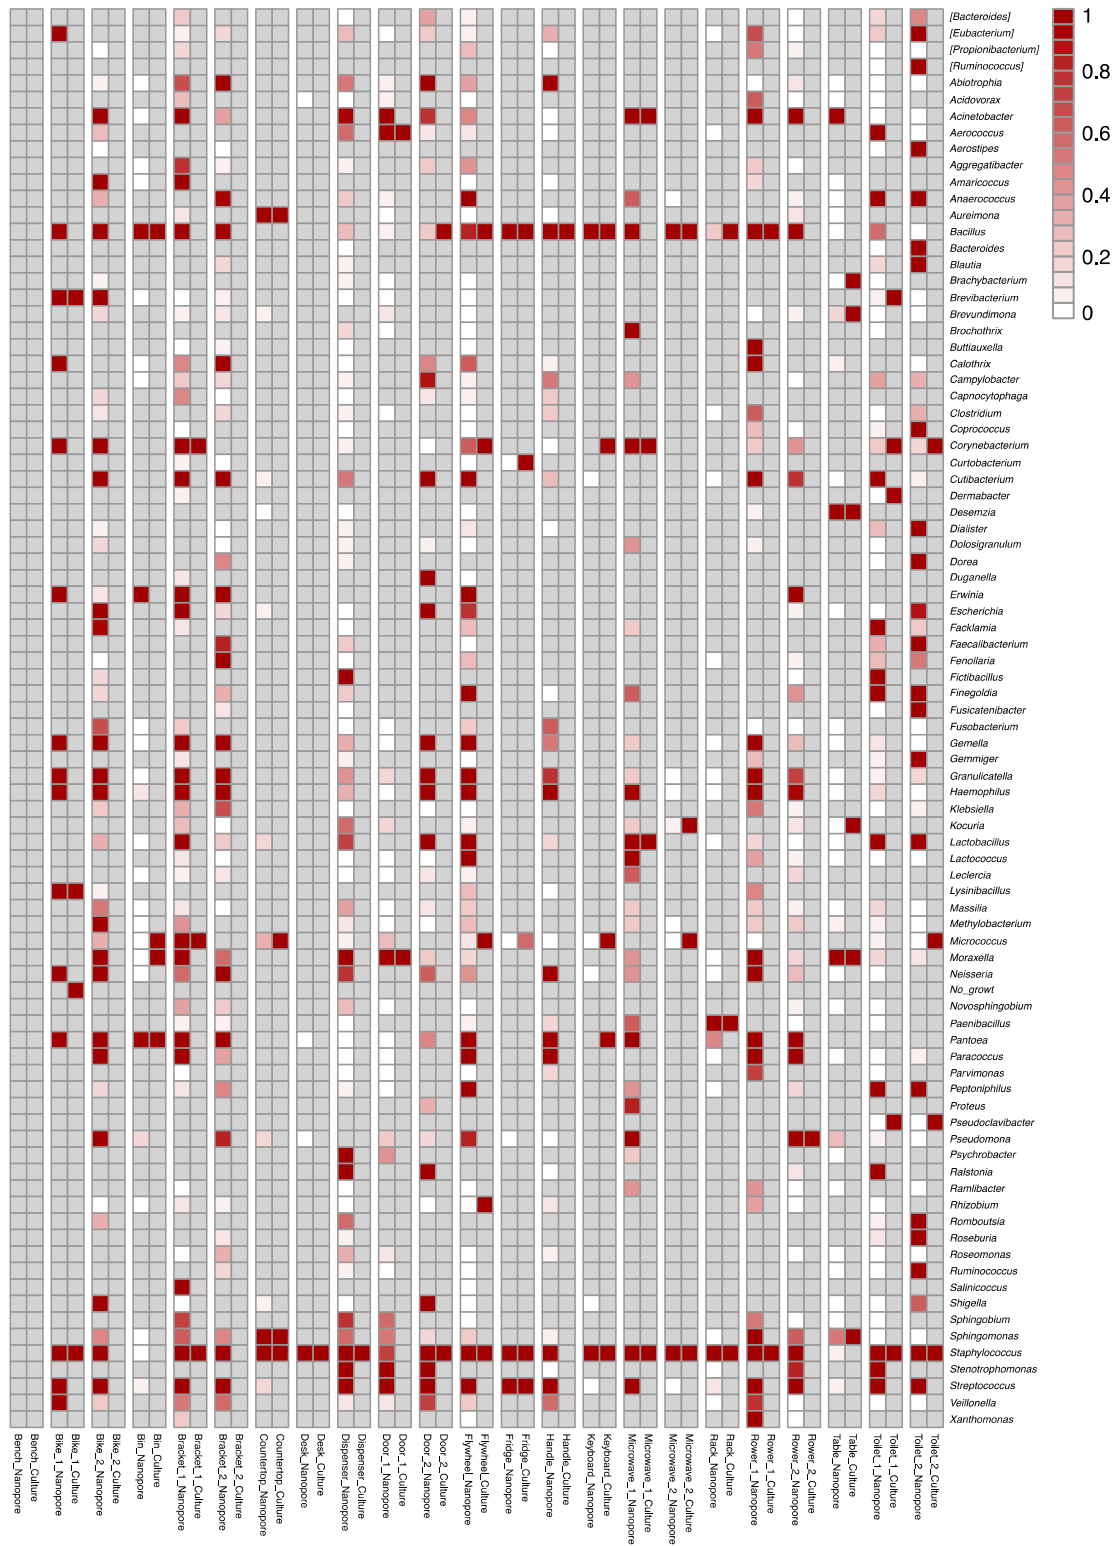

**Figure S1.** Heatmap of the relative abundance for bacterial genus identifications using culture-dependent method as compared to the culture-independent, swab-to-sequencer method. Genus less than 0.02% in abundance are excluded. The least abundant to the most abundant is represented from white to dark red with gray as zero abundance. Relative abundance of culture-based isolates was calculated from the colony forming units (CFU). Sample locations referred to Table S2 for more details.

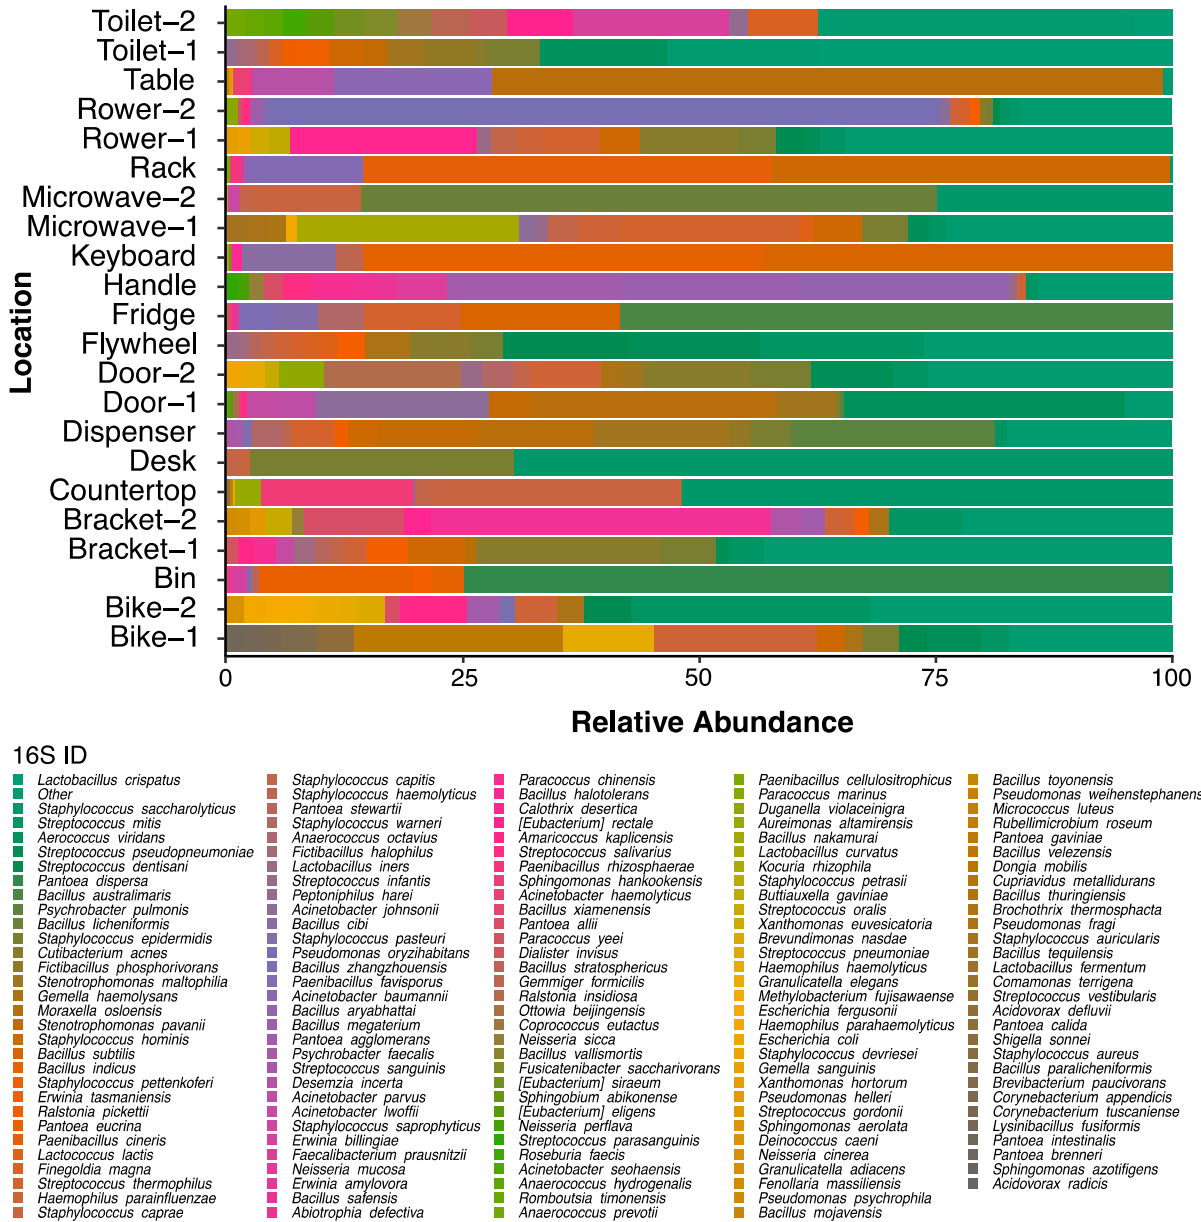

**Figure S2.** The top 15 most abundant suggested species level identifications from ground swabs collected from the NASA Johnson Space Center’s Human Health and Performance Laboratory using the culture-independent, swab-to-sequencer nanopore sequencing method. Alignments performed using minimap2 (-ax map-ont).

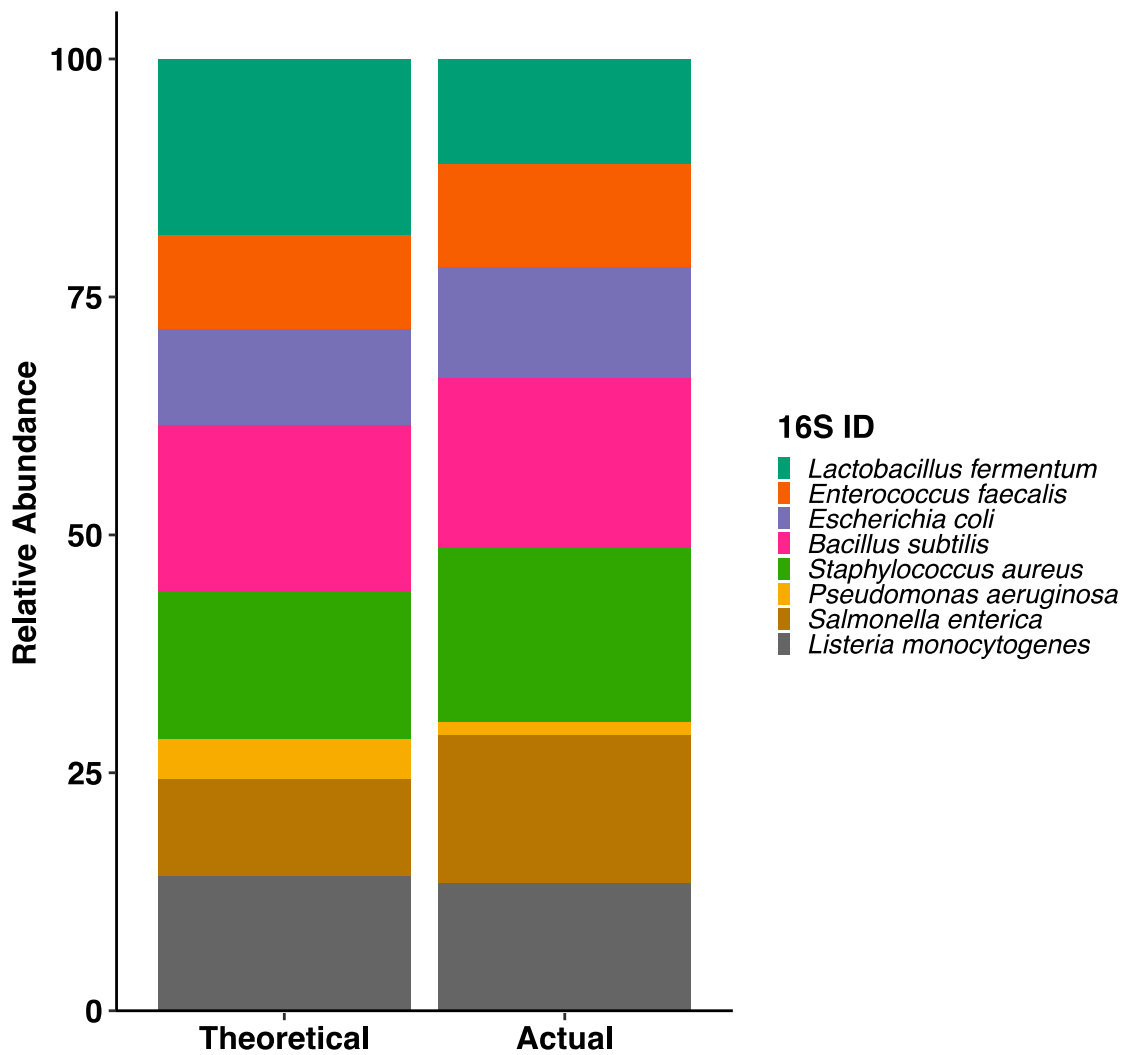

**Figure S3.** Actual vs. theoretical percentage of reads assigned to ZymoBIOMICS Microbial Community Standard reference genomes based on alignment using minimap2 (-ax map-ont). Nanopore sequencing library was prepared using whole-cell ZymoBIOMICS Microbial Community Standard with reagents that were prepared and packaged in parallel to International Space Station reagents and stored at -90°C for > 6 months.

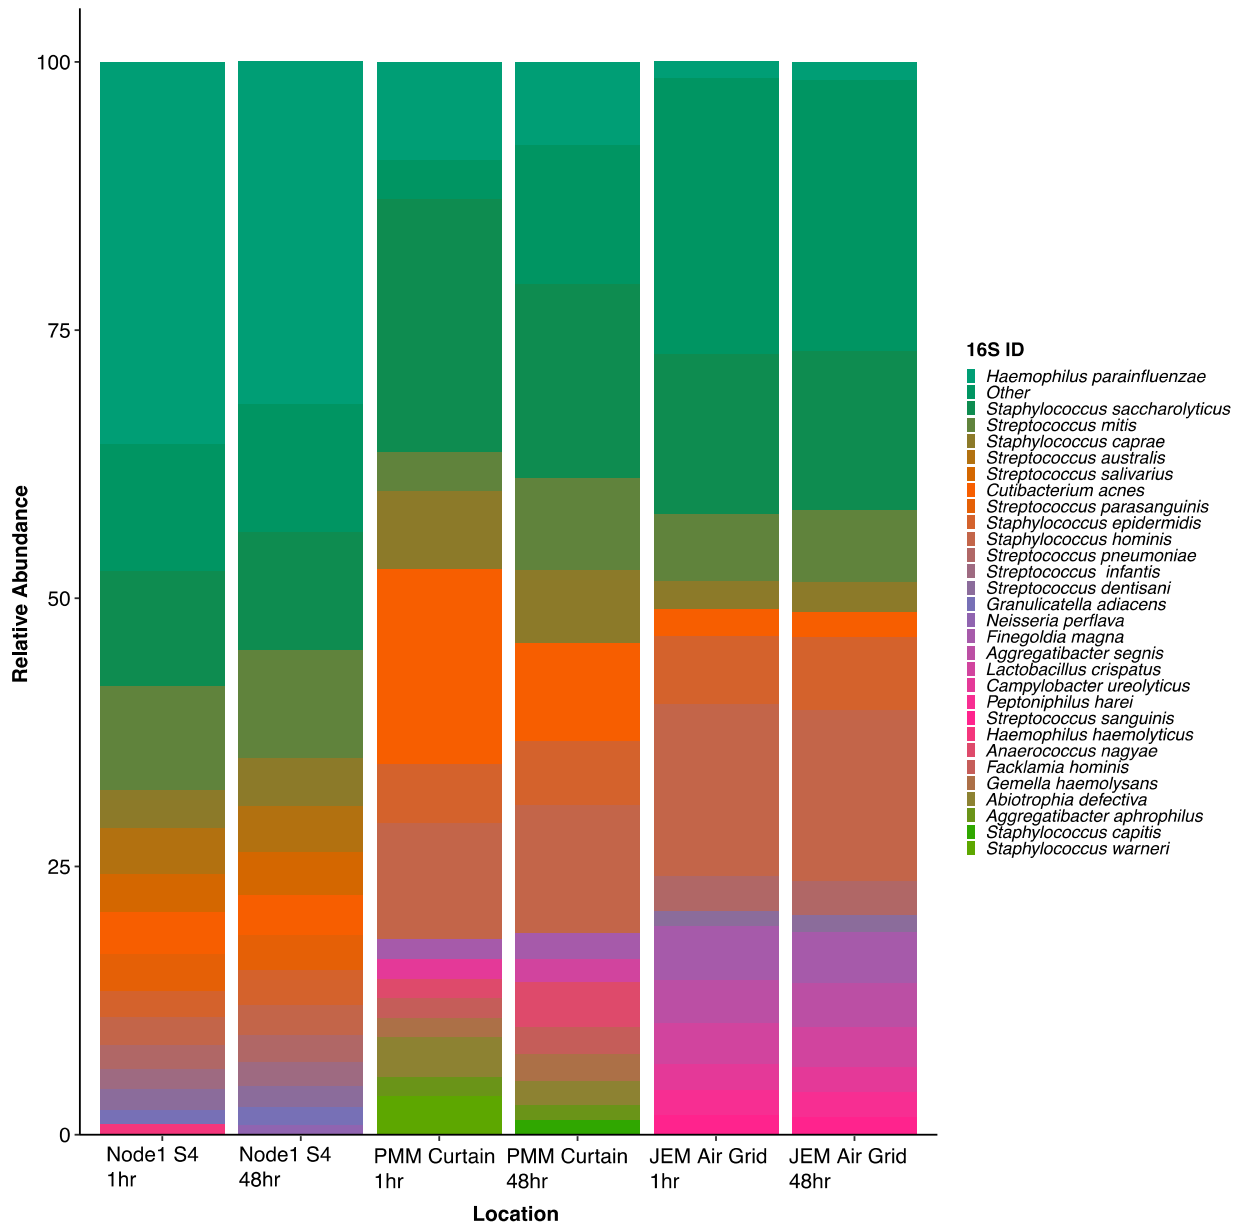

**Figure S4.** Top 15 suggested species level identifications from three distinct locations aboard the International Space Station detected within 1 hour and 48 hours of nanopore sequencing using culture-independent swab-to-sequencer method. Colors represent same identification throughout.

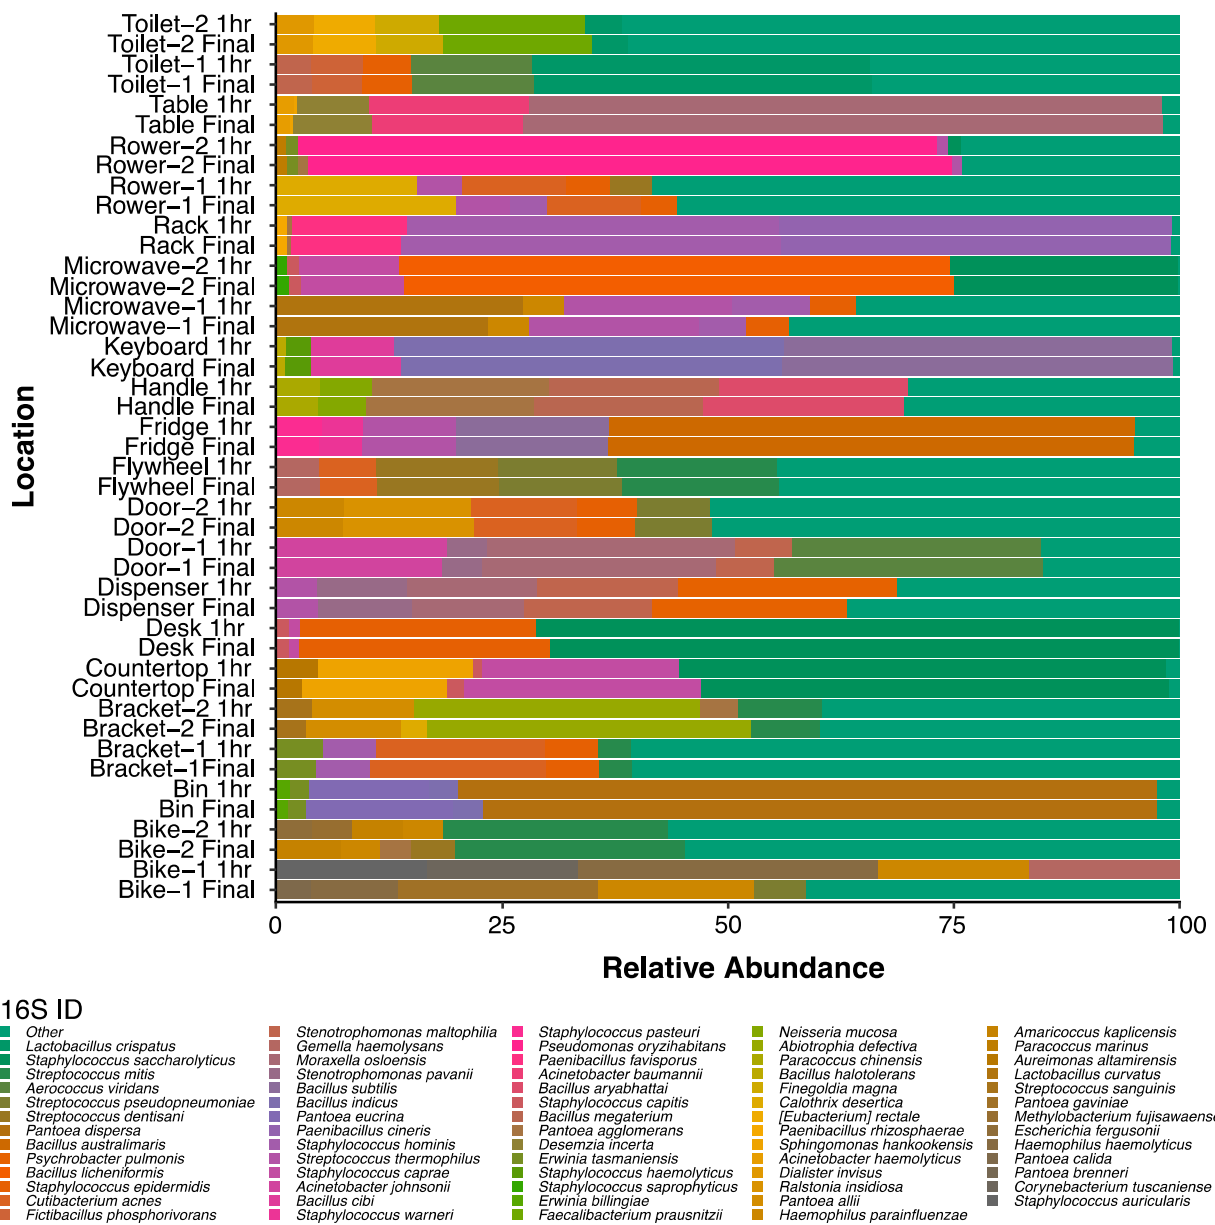

**Figure S5.** Top 5 suggested species level identifications from ground swabs collected from NASA Johnson Space Center’s Human Health and Performance Laboratory at 1 hours vs run completion using the culture-independent, swab-to-sequencer method. Alignments performed using minimap2 (-ax map-ont).
